# Supplementary material
Source: MDPI journal article supplement (https://www.mdpi.com/2227-9040/11/8/431)
Supplement: s1 [file s1]

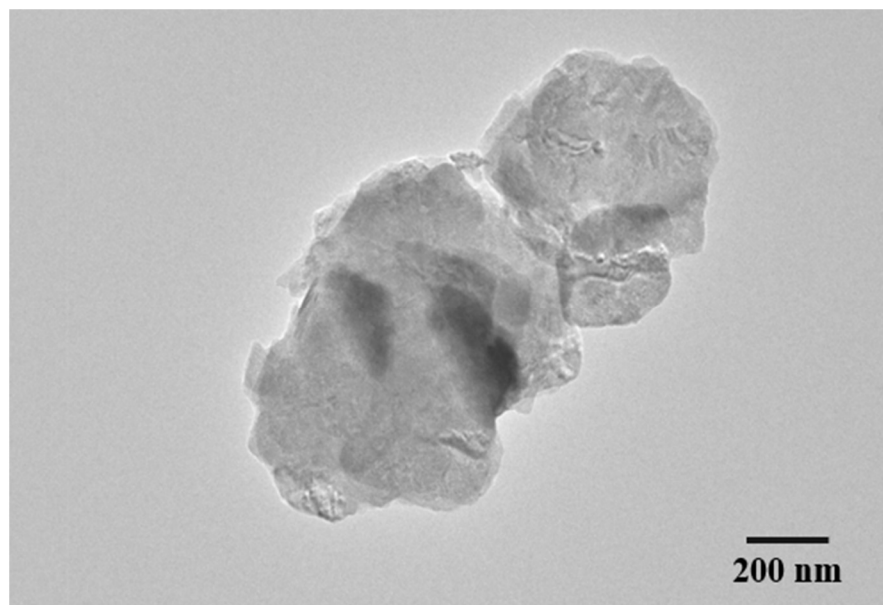

**Figure S1.** TEM image of Cu-MOF.

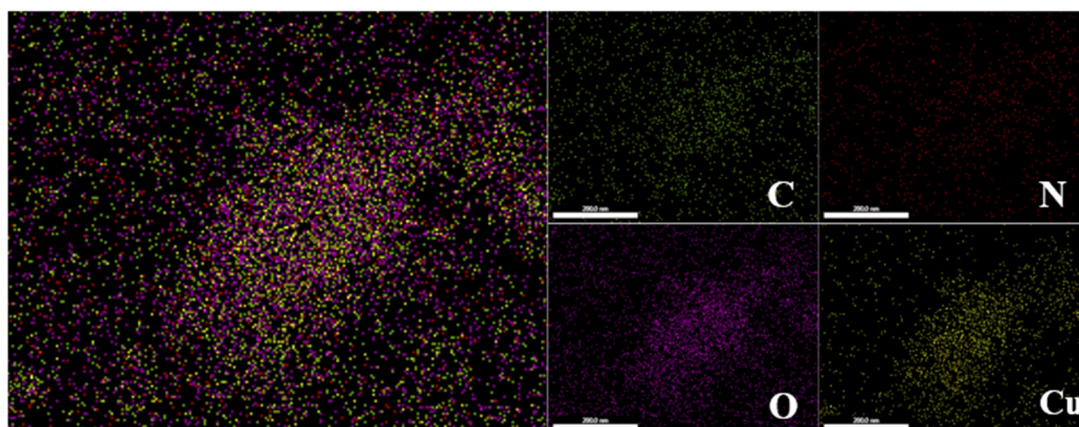

**Figure S2.** EDS mapping spectra of Cu-MOF.

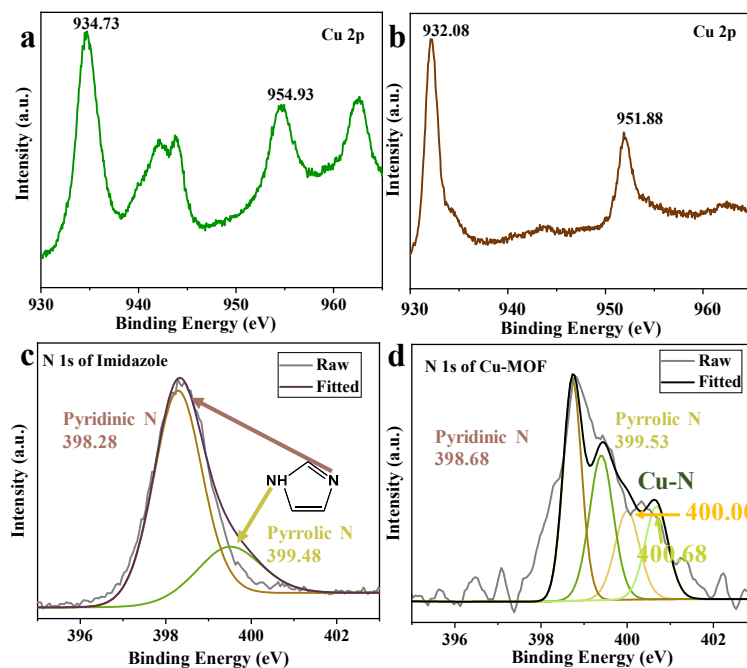

**Figure S3.** (a). Cu 2p XPS spectrum of  $\text{CuCl}_2 \cdot 2\text{H}_2\text{O}$ . (b). Cu 2p XPS spectrum of Cu-MOF. (c). N 1s XPS spectrum of imidazole. (d). N 1s XPS spectrum of Cu-MOF.

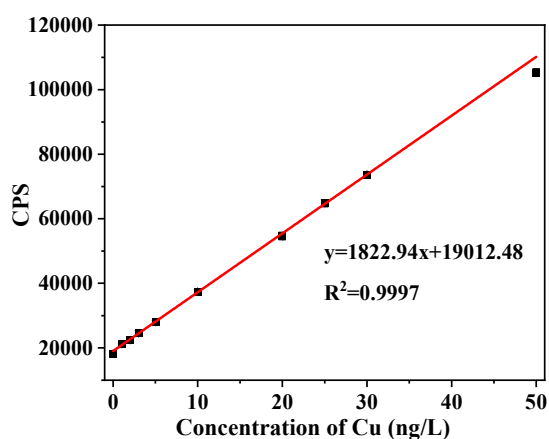

| Sample |        | Cu       | Content  |
|--------|--------|----------|----------|
| ng/L   | CPS    | ng/L     | %        |
| 30     | 36511  | 9.599086 | 31.99695 |
| 75     | 63056  | 24.16076 | 32.21435 |
| 150    | 104092 | 46.6717  | 31.11447 |

**Figure S4.** The mass ratio of Cu-MOF detected by ICP-OES.

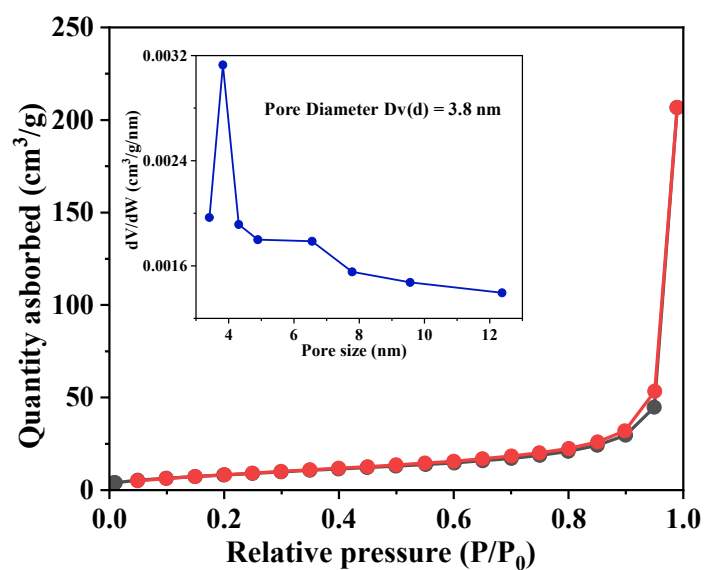

Figure S5. N<sub>2</sub> sorption isotherms and pore size distribution curves of Cu-MOF.

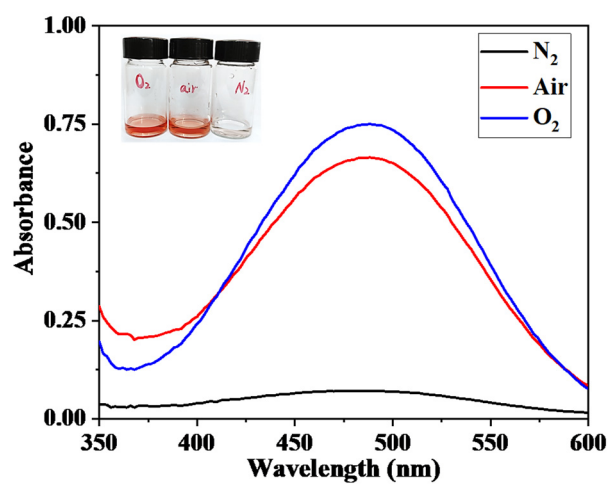

Figure S6. The catalytic activity of Cu-MOF under different gas atmospheres.

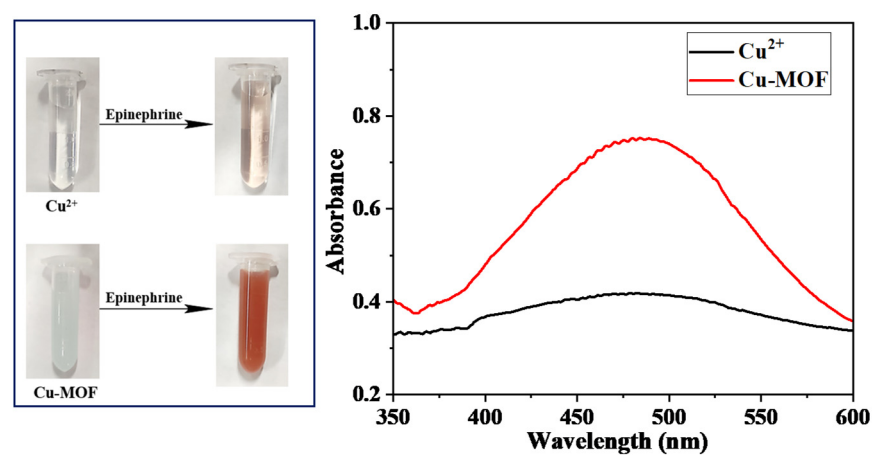

Figure S7. Comparison of catalytic performance of epinephrine between copper ions and Cu-MOF at the same concentration.

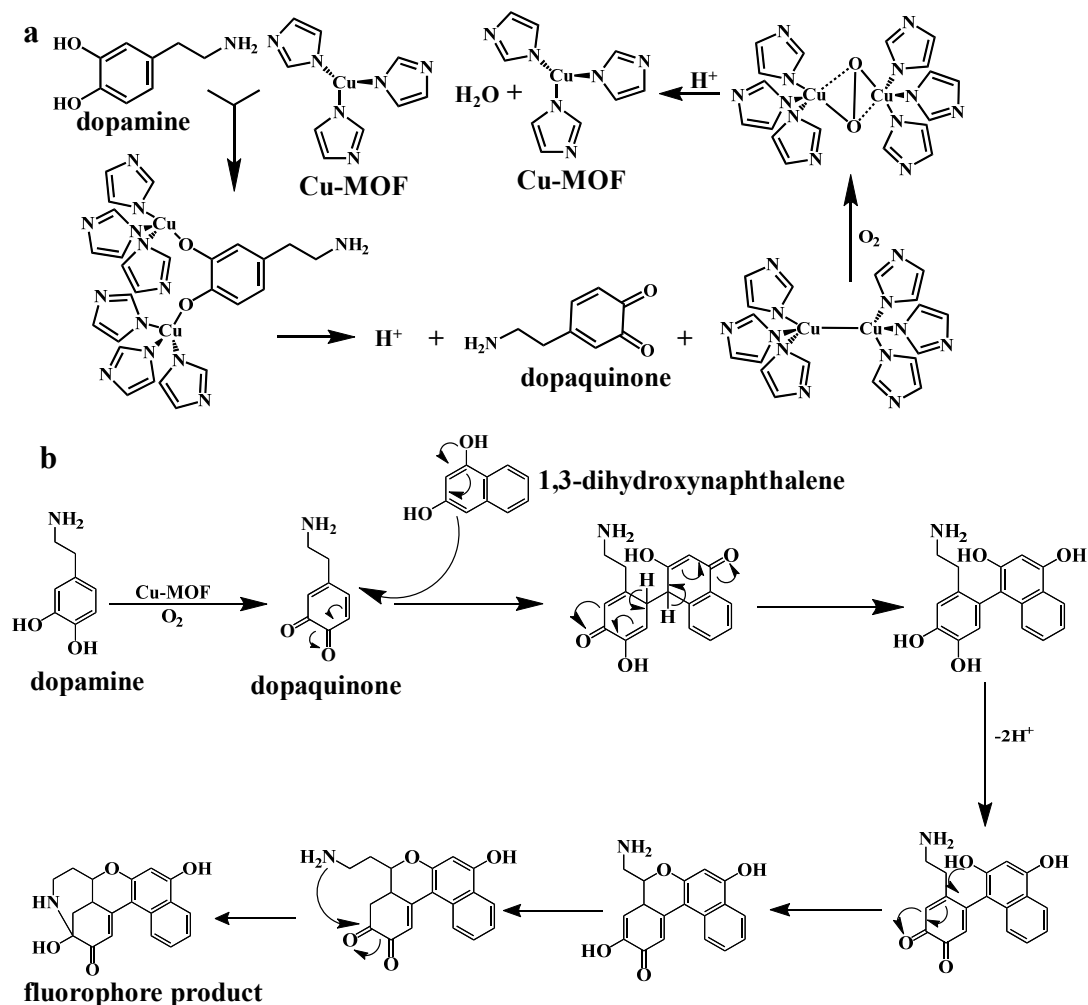

**Figure S8.** (a) The possible mechanism of the oxidation of dopamine to dopaquinone catalyzed by Cu-MOF, and (b) the formation of fluorescent products by intramolecular Michael addition of dopaquinone and 1,3-dihydroxynaphthalene.

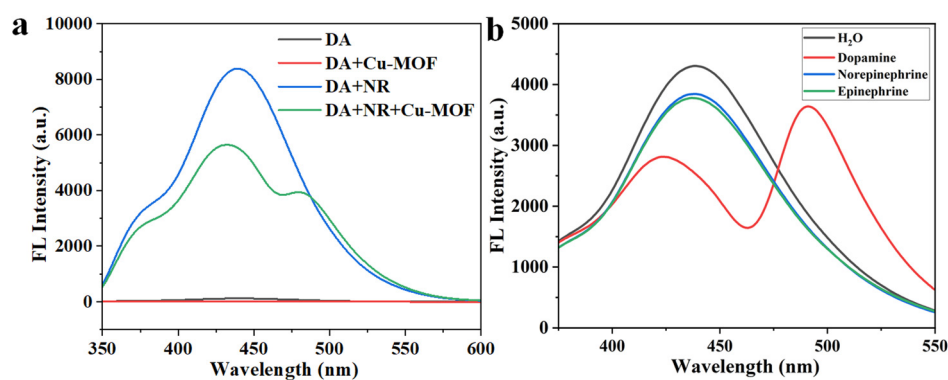

**Figure S9.** (a) Fluorescence spectra of DA, DA + Cu-MOF, DA + NR, and DA + NR + Cu-MOF; (b) Fluorescence response of Cu-MOF system towards different catecholamine neurotransmitters spectra. Color code: black (H<sub>2</sub>O), red (Dopamine), blue (Norepinephrine) and green (Epinephrine).

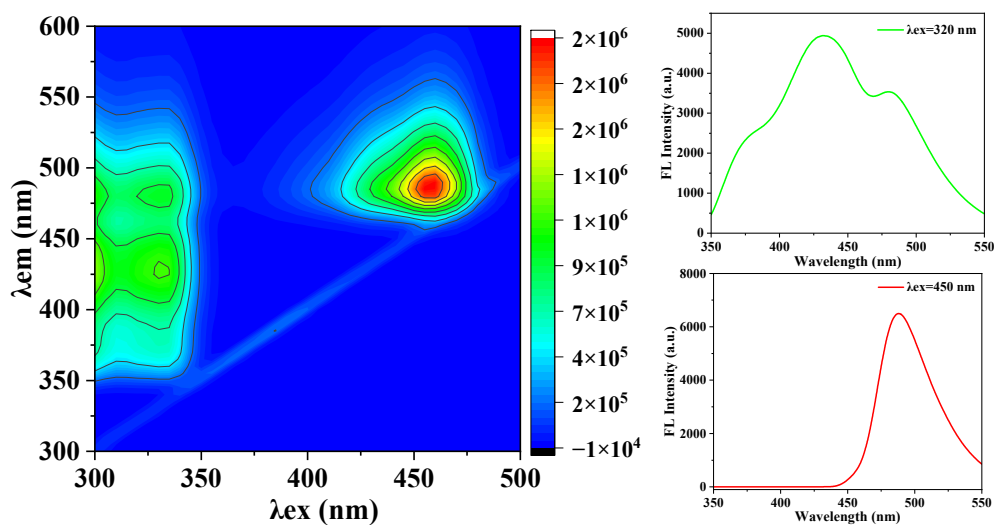

**Figure S10.** 3D fluorescence scan of Cu-MOF+NR+DA system and corresponding fluorescence emission peak under 320 nm/450 nm excitation.

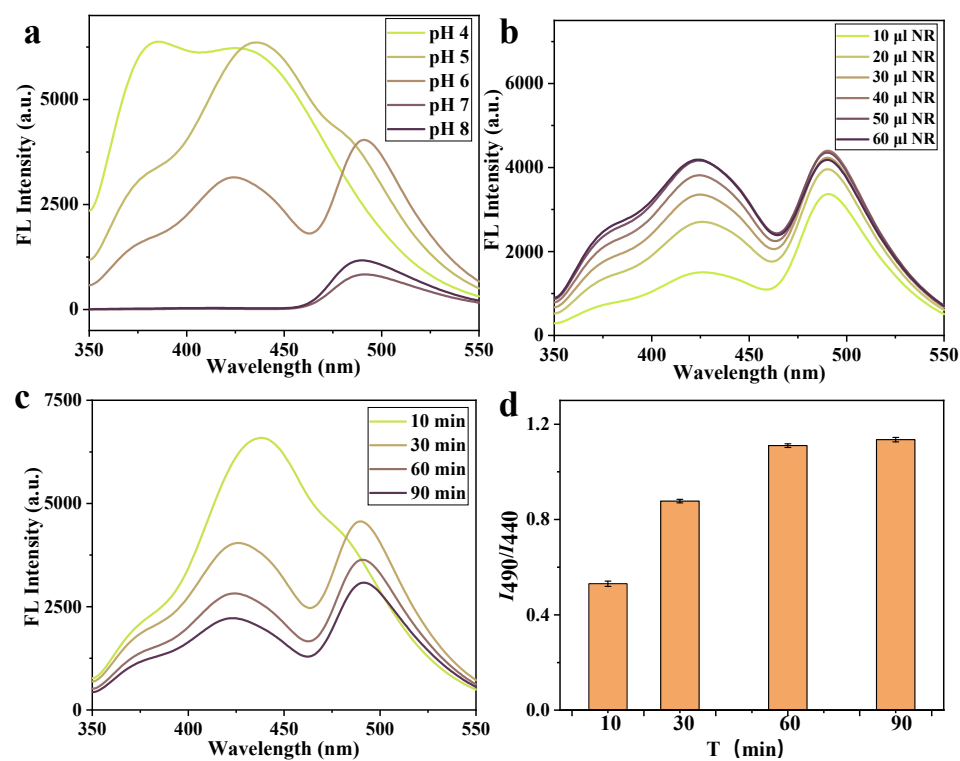

**Figure S11.** The fluorescent responses of Cu-MOF system to DA at different (a) pH values; (b) NR volume and (c) reaction time. (d) The  $I_{490}/I_{440}$  responses of Cu-MOF system to DA at different reaction times. All the error bars were calculated from three parallel experiments.

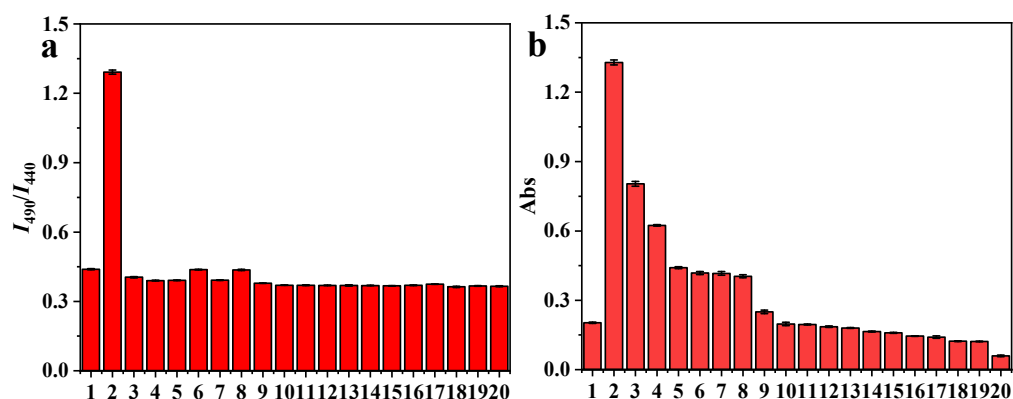

**Figure S12.** The selectivity of the Cu-MOF platform to DA and other possible interfering substances by fluorescent mode and colorimetric mode. Detection of species and concentrations: 1. Blank; 2. DA (20  $\mu\text{M}$ ); 3. uric acid (200  $\mu\text{M}$ ); 4.  $\text{Na}_2\text{CO}_3$  (20 mM); 5. KCl (20 mM); 6. NaCl (20 mM); 7. epinephrine (20  $\mu\text{M}$ ); 8. norepinephrine (20  $\mu\text{M}$ ); 9. D-glucose (200  $\mu\text{M}$ ); 10. L-tryptophan (200  $\mu\text{M}$ ); 11. L-alanine (200  $\mu\text{M}$ ); 12. L-isoleucine (200  $\mu\text{M}$ ); 13. L-lysine (200  $\mu\text{M}$ ); 14. L-aspartic acid (200  $\mu\text{M}$ ); 15. L-glutamic acid (200  $\mu\text{M}$ ); 16. L-phenylalanine (200  $\mu\text{M}$ ); 17. ascorbic acid (200  $\mu\text{M}$ ); 18. Tannic acid (200  $\mu\text{M}$ ); 19. L-cysteine (200  $\mu\text{M}$ ); 20. GSH (200  $\mu\text{M}$ ). All the error bars were calculated from three parallel experiments.

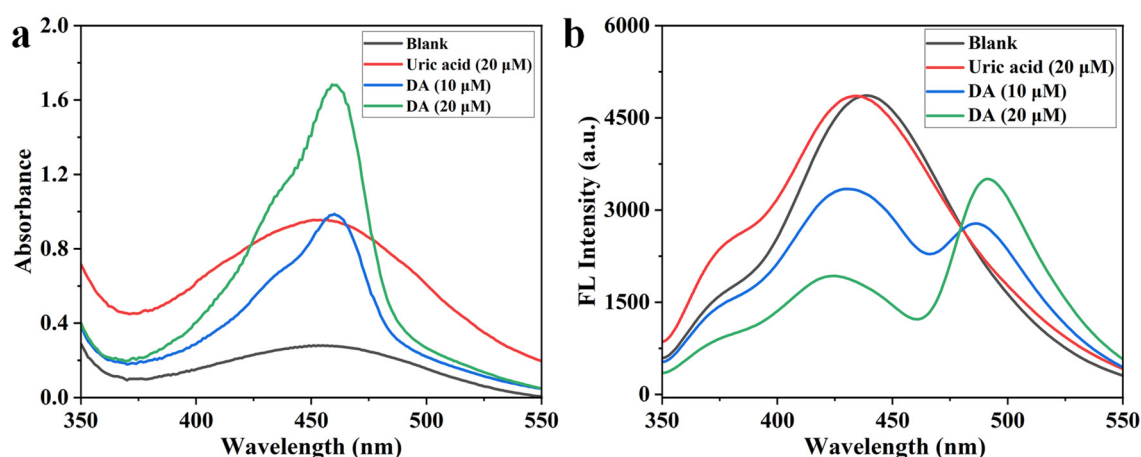

**Figure S13.** (a) Fluorescence spectra and (b) absorption spectra of the Cu-MOF sensing system with the addition of only uric acid, DA and DA + NR + Cu-MOF in aqueous solutions.

**Table S1.** DA Determination in Healthy Human Urine Samples by the Cu-MOF Platform through Three Modes <sup>1</sup>.

| DA ( $\mu\text{M}$ ) | Fluorescent recovery (%) | RSD (%) | Colorimetric recovery (%) | RSD (%) | Smartphone recovery (%) | RSD (%) |
|----------------------|--------------------------|---------|---------------------------|---------|-------------------------|---------|
| 5                    | 100.67                   | 0.62    | 101.15                    | 0.49    | 106.61                  | 3.34    |
| 10                   | 102.35                   | 0.73    | 99.23                     | 1.13    | 97.30                   | 1.66    |
| 15                   | 104.87                   | 0.53    | 95.28                     | 2.36    | 103.33                  | 1.06    |

<sup>1</sup> The means were calculated from three parallel experiments.

**Table S2.** DA Determination in dopamine hydrochloride injection sample by the Cu-MOF Platform through three modes <sup>1</sup>.

| Sample content ( $\mu\text{M}$ ) | Mode         | Measured content ( $\mu\text{M}$ ) | RSD (%) |
|----------------------------------|--------------|------------------------------------|---------|
| 2.5                              | Fluorescence | 2.78                               | 1.41    |
|                                  | Colorimetry  | 2.45                               | 5.48    |
|                                  | Smartphone   | 2.45                               | 10.61   |

<sup>1</sup> The means were calculated from three parallel experiments.

**Table S3.** DA Determination in Human with High Uric Acid Urine Samples with High Level of Uric Acid by the Cu-MOF Platform through Three Modes <sup>1</sup>.

| MODE         | The ratio of signal output before and after 200 $\mu$ M of DA spiking |                                            | RSD (%) |
|--------------|-----------------------------------------------------------------------|--------------------------------------------|---------|
|              | Normal urine                                                          | Urine spiked with 200 $\mu$ M of uric acid |         |
| Fluorescence | 2.223                                                                 | 2.315                                      | 4.61    |
| Colorimetry  | 4.545                                                                 | 1.771                                      | 138.73  |
| Smartphone   | 1.265                                                                 | 1.328                                      | 3.15    |

<sup>1</sup> The means were calculated from three parallel experiments.
